# Supplementary material for: Class 2 Heating Cycles: A New Class of Thermodynamic Cycles
Source: Preprints.org preprint supplement (doi:10.20944/preprints202111.0040.v1), 2021-11-02
Supplement: Supplementary file 1 [file supplementary]

# Class 2 heating cycles: A new class of thermodynamic cycles

Hua-Yu Li<sup>1,\*</sup> and Hong-Rui Li<sup>2,\*</sup>

<sup>1</sup>Department of Energy and Power engineering, China University of Petroleum (East China), Qingdao, Shandong 266580, China.

<sup>2</sup>Key Laboratory of Efficient Utilization of Low and Medium Grade Energy (Ministry of Education), Tianjin University, Tianjin 300350, China.

\*Corresponding authors: lihy1963@upc.edu.cn (H.-Y.L.); lhr@tju.edu.cn (H.-R.L.)

ORCID: 0000-0002-8229-019X (H.-Y.L.); 0000-0003-0249-7260 (H.-R.L.)

## Supplementary Information

Figure S1 shows three typical examples of class 2 heating cycles (HC-2s), which have been presented in the main text. Without loss of generality, they are all in basic form A (HC-2A). Here we derive their coefficients of performance (COPs, the ratio of the cycle's output to input) for high-temperature heating when the cycle's net work output  $W_{\text{net}} = 0$ . The former two cycles are regarded as internally reversible <sup>[1]</sup>.

### 1. The HC-2A with isothermal heat transfer processes (Figure S1a)

According to the law of conservation of energy, we have

$$W_{\text{net}} = Q_{\text{in}} - Q_{\text{out, H}} - Q_{\text{out, L}} = 0 \quad (\text{S1})$$

where  $Q_{\text{in}}$  is the heat absorbed from the medium-temperature heat source by the cycle,  $Q_{\text{out, H}}$  is the heat rejected to the high-temperature heat sink by the cycle, and  $Q_{\text{out, L}}$  is the heat rejected to the low-temperature heat sink by the cycle.

The cycle's net entropy change should be zero. Thus,

$$\oint dS = \frac{Q_{\text{in}}}{T_M} - \frac{Q_{\text{out, H}}}{T_H} - \frac{Q_{\text{out, L}}}{T_L} = 0 \quad (\text{S2})$$

Combining Eq. (S1) and Eq. (S2), we can express the COPs as

$$\text{COP}_{\text{HD}} = \frac{Q_{\text{out, H}}}{Q_{\text{in}}} = \frac{T_H(T_M - T_L)}{T_M(T_H - T_L)} \quad (\text{S3})$$

$$\text{COP}_{\text{CD}} = \frac{Q_{\text{out, H}}}{Q_{\text{out, L}}} = \frac{T_H(T_M - T_L)}{T_L(T_H - T_M)} \quad (\text{S4})$$

where  $\text{COP}_{\text{HD}}$  and  $\text{COP}_{\text{CD}}$  are the COPs when the cycle is driven by medium-temperature heat and by low-temperature cold energy respectively.

## 2. The HC-2A with isobaric heat transfer processes, employing an ideal gas as its working medium (Figure S1b)

Notice that state point 7 follows the rules of both heat absorption and depressurization. Dividing the medium-temperature heat  $Q_{\text{in}}$  into two parts, and regarding the ideal gas's isobaric specific heat  $c_p$  as constant<sup>[1]</sup>, we obtain

$$W_{\text{net}} = Q_{\text{in}} - Q_{\text{out, H}} - Q_{\text{out, L}} = (Q_{\text{in}}^{(1)} + Q_{\text{in}}^{(2)}) - Q_{\text{out, H}} - Q_{\text{out, L}} = 0 \quad (\text{S5})$$

$$\begin{aligned} Q_{\text{in}}^{(1)} &= H_7 - H_2 = mc_p(T_7 - T_2) \\ Q_{\text{in}}^{(2)} &= H_3 - H_7 = mc_p(T_3 - T_7) \\ Q_{\text{out, H}} &= H_4 - H_5 = mc_p(T_4 - T_5) \\ Q_{\text{out, L}} &= H_6 - H_1 = mc_p(T_6 - T_1) \end{aligned} \quad (\text{S6})$$

where  $H$  is the working medium's enthalpy at each state point,  $m$  is the working medium's mass, and  $T$  is the working medium's thermodynamic temperature at each state point.

According to the behavior of the ideal gas <sup>[1]</sup> and Eq. (S6), we have

$$\left(\frac{p_H}{p_M}\right)^{\frac{k-1}{k}} = \frac{T_4}{T_3} = \frac{T_5}{T_7} = \frac{T_4 - T_5}{T_3 - T_7} = \frac{Q_{\text{out, H}}}{Q_{\text{in}}^{(2)}} \quad (\text{S7})$$

$$\left(\frac{p_M}{p_L}\right)^{\frac{k-1}{k}} = \frac{T_7}{T_6} = \frac{T_2}{T_1} = \frac{T_7 - T_2}{T_6 - T_1} = \frac{Q_{\text{in}}^{(1)}}{Q_{\text{out, L}}} \quad (\text{S8})$$

where  $k$  is the ideal gas's specific heat ratio.

Combining Eq. (S5), Eq. (S7) and Eq. (S8), we can express the COPs as

$$\text{COP}_{\text{HD}} = \frac{Q_{\text{out, H}}}{Q_{\text{in}}} = \frac{Q_{\text{out, H}}}{Q_{\text{in}}^{(1)} + Q_{\text{in}}^{(2)}} = \frac{p_H^{\frac{k-1}{k}} \left( p_M^{\frac{k-1}{k}} - p_L^{\frac{k-1}{k}} \right)}{p_M^{\frac{k-1}{k}} \left( p_H^{\frac{k-1}{k}} - p_L^{\frac{k-1}{k}} \right)} \quad (\text{S9})$$

$$\text{COP}_{\text{CD}} = \frac{Q_{\text{out, H}}}{Q_{\text{out, L}}} = \frac{p_H^{\frac{k-1}{k}} \left( p_M^{\frac{k-1}{k}} - p_L^{\frac{k-1}{k}} \right)}{p_L^{\frac{k-1}{k}} \left( p_H^{\frac{k-1}{k}} - p_M^{\frac{k-1}{k}} \right)} \quad (\text{S10})$$

or

$$\text{COP}_{\text{HD}} = \frac{T_5(T_7 - T_6)}{T_7(T_5 - T_6)} = \frac{T_4(T_2 - T_1)}{T_2T_4 - T_1T_3} \quad (\text{S11})$$

$$\text{COP}_{\text{CD}} = \frac{T_5(T_7 - T_6)}{T_6(T_5 - T_7)} = \frac{T_4(T_2 - T_1)}{T_1(T_4 - T_3)} \quad (\text{S12})$$

### 3. The HC-2A with isobaric heat transfer processes, employing a phase-change working medium (Figure S1c)

$$\text{COP}_{\text{HD}} = \frac{Q_{\text{out, H}}}{Q_{\text{in}}} = \frac{H_4 - H_5}{H_3 - H_2} = \frac{h_4 - h_5}{h_3 - h_2} \quad (\text{S13})$$

$$\text{COP}_{\text{CD}} = \frac{Q_{\text{out, H}}}{Q_{\text{out, L}}} = \frac{H_4 - H_5}{H_6 - H_1} = \frac{h_4 - h_5}{h_6 - h_1} \quad (\text{S14})$$

where  $h$  is the working medium's enthalpy per unit of mass at each state point. These two formulae cannot be further simplified because the behavior of the phase-change working medium is much more complex than that of the ideal gas.

When  $W_{\text{net}} \neq 0$ , we can also obtain the cycles' COPs in a similar way. However, since heat and power differ in grade, the meanings of such formulae are not clear.

## 1 Figures

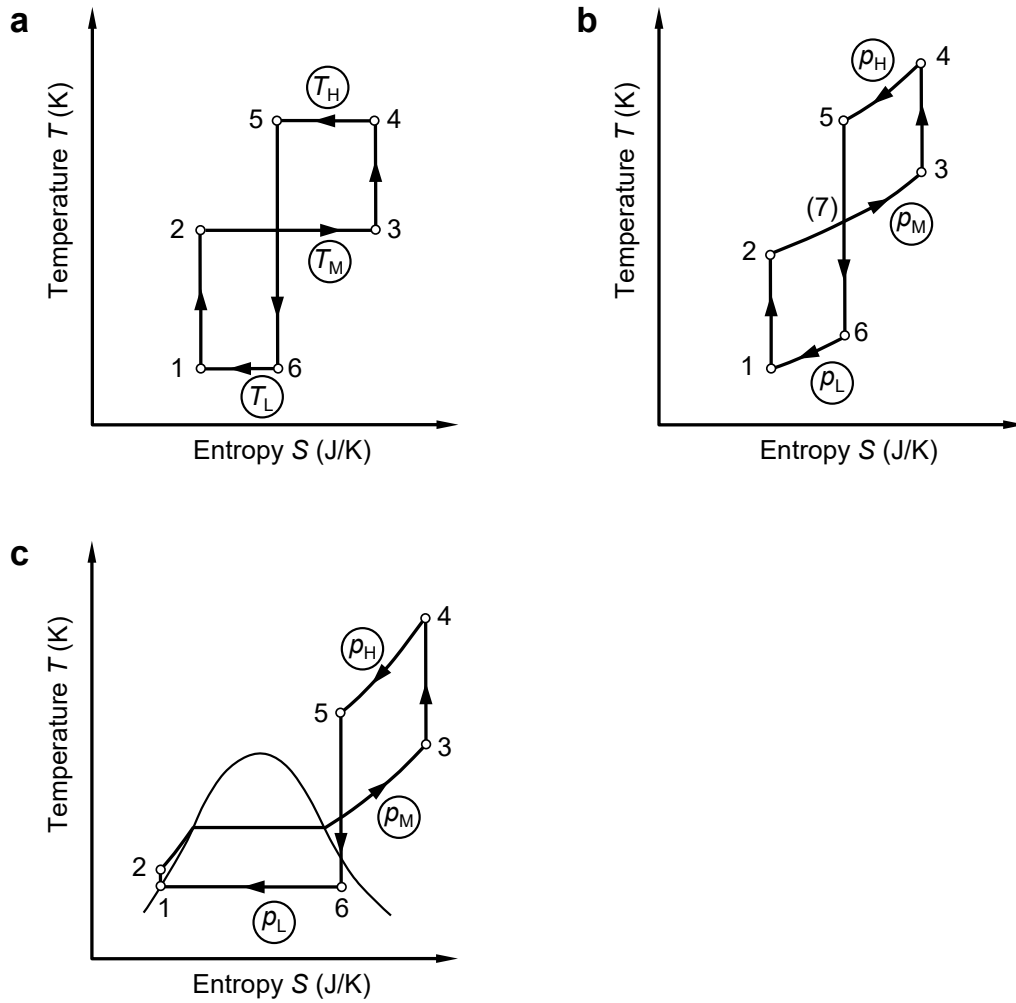

2

3 **Figure S1. Three typical examples of HC-2s. (a)** An HC-2A with isothermal heat  
4 transfer processes.  $T_H$ ,  $T_M$  and  $T_L$  are the working medium's thermodynamic  
5 temperatures during high-temperature heat rejection, medium-temperature heat  
6 absorption, and low-temperature heat rejection, respectively. **(b)** An HC-2A with  
7 isobaric heat transfer processes, employing an ideal gas as its working medium. State  
8 point 7 is the state passed through by both process 2-3 and process 5-6. **(c)** An HC-2A  
9 with isobaric heat transfer processes, employing a phase-change working medium. In  
10 (b) and (c),  $p_H$ ,  $p_M$  and  $p_L$  are the working medium's pressures during high-

- 1 temperature heat rejection, medium-temperature heat absorption, and low-temperature
- 2 heat rejection, respectively.

1    **References**

- 2    [1] Çengel YA, Boles MA, Kanoğlu M. Thermodynamics: An engineering approach.  
3    9 ed. New York: McGraw-Hill Education, 2019.
